# Supplementary material for: Redefining the invertebrate RNA virosphere
Source: Springer Nature journal article supplement (doi:10.1038/nature20167), 2016-11-22
Supplement: 41586_2016_BFnature20167_MOESM438_ESM.pdf [file 41586_2016_BFnature20167_MOESM438_ESM.pdf]

**Supplementary Table 1. Host and geographic information and data output for each pool of invertebrate samples**

| Library                                                         | Short Name | Host Classification     | Host species (No. of individual)                                                                                                                                                                                                                                                                                                                                                                           | Sample type      | Locations (Habitat)     | Data generated (bp) | Library accession |
|-----------------------------------------------------------------|------------|-------------------------|------------------------------------------------------------------------------------------------------------------------------------------------------------------------------------------------------------------------------------------------------------------------------------------------------------------------------------------------------------------------------------------------------------|------------------|-------------------------|---------------------|-------------------|
| Cockroaches <sup>a</sup>                                        | ZL         | Arthropoda: Insecta     | <i>Blattella germanica</i> (22)                                                                                                                                                                                                                                                                                                                                                                            | Whole individual | Hubei (Terrestrial)     | 6,182,028,000       | SRX833674         |
| Coleoptera mix Hubei                                            | QCM        | Arthropoda: Insecta     | <i>Coleoptera</i> sp. (24), <i>Holotrichia</i> sp. (3), <i>Harmonia axyridis</i> (2), <i>Apriona germari</i> (2), <i>Harpalus</i> sp (1).                                                                                                                                                                                                                                                                  | Whole individual | Hubei (Terrestrial)     | 9,108,100,600       | SRR3400834        |
| Conehead cricket mix Hubei (subset of ZCM)                      | WHLC       | Arthropoda: Insecta     | <i>Conocephalus</i> sp.(4)                                                                                                                                                                                                                                                                                                                                                                                 | Whole individual | Hubei (Terrestrial)     | 2,450,413,000       | SRR3400836        |
| Cricket mix Hubei (subset of ZCM)                               | WHXS       | Arthropoda: Insecta     | <i>Gryllidae</i> sp.(3)                                                                                                                                                                                                                                                                                                                                                                                    | Whole individual | Hubei (Terrestrial)     | 3,707,111,000       | SRR3400837        |
| Diptera mix Hubei                                               | SCM        | Arthropoda: Insecta     | <i>Drosophila immigrans</i> (3), <i>Episyrphus balteatus</i> (3), <i>Diptera</i> sp (2 species, 5-10 individuals), <i>Sarcophaga</i> sp, <i>Muscina stabulans</i> (5-10), <i>Ptecticus tenebrifer</i> (5-10), <i>Ptecticus</i> sp (5-10)                                                                                                                                                                   | Whole individual | Hubei (Terrestrial)     | 9,662,701,600       | SRR3400838        |
| Earwig mix Hubei                                                | GCM        | Arthropoda: Insecta     | <i>Dermaptera</i> sp.(10)                                                                                                                                                                                                                                                                                                                                                                                  |                  | Hubei (Terrestrial)     | 3,759,661,600       | SRR3400839        |
| Flea and ants mix Hubei (subset of arthropodmix)                | WHZM       | Arthropoda: Insecta     | <i>Ctenocephalides felis</i> (10-15), <i>Tetramorium tsushimae</i> (N/A)                                                                                                                                                                                                                                                                                                                                   | Whole individual | Hubei (Terrestrial)     | 1,680,999,000       | SRR3400840        |
| Freshwater heteroptera Shahe (subset of SHWCII)                 | SHWC01c    | Arthropoda: Insecta     | <i>Heteroptera</i> sp.(12)                                                                                                                                                                                                                                                                                                                                                                                 | Whole individual | Beijing (Freshwater)    | 3,045,273,000       | SRR3400841        |
| Heteroptera mix Hubei (subset of arthropodmix)                  | WHYCM      | Arthropoda: Insecta     | <i>Heteroptera</i> sp.(10)                                                                                                                                                                                                                                                                                                                                                                                 | Whole individual | Hubei (Terrestrial)     | 3,702,569,600       | SRR3400891        |
| Horseflies <sup>a</sup>                                         | Horsefly   | Arthropoda: Insecta     | <i>Tabanidae</i> sp. (5 species, 22 individuals)                                                                                                                                                                                                                                                                                                                                                           | Whole individual | Hubei (Terrestrial)     | 8,721,642,060       | SRX833673         |
| Insects mix 1 <sup>a</sup>                                      | InsectZJ   | Arthropoda: Insecta     | <i>Abraxas tenuisuffusa</i> (1), <i>Hermetia illucens</i> (N/A), <i>Chrysopidae</i> sp (2), <i>Coleoptera</i> sp. (1), <i>Psychoda alternata</i> (1), <i>Diptera</i> sp. (N/A), <i>Stratiomyidae</i> sp (2)                                                                                                                                                                                                | Whole individual | Zhejiang (Terrestrial)  | 7,745,172,660       | SRX833685         |
| Insects mix 2 <sup>a</sup>                                      | CC         | Arthropoda: Insecta     | <i>Hippoboscidae</i> sp. (2 species, 10-15 individuals), <i>Cimex hemipterus</i> (8)                                                                                                                                                                                                                                                                                                                       | Whole individual | Hubei (Terrestrial)     | 5,916,431,520       | SRX833687         |
| Insects mix 4 <sup>a</sup>                                      | WHCCII     | Arthropoda: Insecta     | <i>Psychoda alternata</i> (3), <i>Velarifictorus micado</i> (4), <i>Crocothemis servilia</i> (1), <i>Phoridae</i> sp (1), <i>Lampyridae</i> sp (1), <i>Aphelinus</i> sp (~10), <i>Hyalopterus pruni</i> (~10), <i>Aulacorthum magnolia</i> (~10)                                                                                                                                                           | Whole individual | Hubei (Terrestrial)     | 6,882,491,800       | SRX833692         |
| Lepidoptera mix Hubei                                           | LCM        | Arthropoda: Insecta     | <i>Helcyra</i> sp (1), <i>Papilio polytes</i> (1), <i>Pieris rapae</i> (6), <i>Nolidae</i> sp. (1), <i>Stauropus basalus</i> (2), <i>Peridea</i> sp (1), <i>Amraica superans</i> (1), <i>Calliteara</i> sp. (1), <i>Lymantriidae</i> sp. (1), <i>Noctuidae</i> sp. (4), <i>Clostera anastomosis</i> (1), <i>Hypomecis punctinalis</i> (1), <i>Eumorphobotys</i> sp (1), <i>Micromelalopha sieversi</i> (1) | Whole individual | Hubei (Terrestrial)     | 7,038,068,800       | SRR3400941        |
| Mosquitoes - Hubei S (subset of mosHB)                          | 3mos       | Arthropoda: Insecta     | <i>Culex tritaeniorhynchus</i> (5-10), <i>Armigeres subalbatus</i> (5-10)                                                                                                                                                                                                                                                                                                                                  | Whole individual | Hubei (Terrestrial)     | 5,629,066,740       | SRR3401027        |
| Mosquitoes - Hubei <sup>a</sup>                                 | mosHB      | Arthropoda: Insecta     | <i>Aedes</i> sp. (5), <i>Armigeres subalbatus</i> (~50), <i>Anopheles sinensis</i> (~60), <i>Culex quinquefasciatus</i> (~50), <i>Culex tritaeniorhynchus</i> (~30)                                                                                                                                                                                                                                        | Whole individual | Hubei (Terrestrial)     | 26,606,799,000      | SRX833542         |
| Mosquitoes - Zhejiang <sup>a</sup>                              | mosZJ      | Arthropoda: Insecta     | <i>Aedes albopictus</i> (5), <i>Armigeres subalbatus</i> (~30), <i>Anopheles paraliae</i> (~10), <i>Anopheles sinensis</i> (~20), <i>Culex pipiens</i> (~30), <i>Culex</i> sp. (~10), <i>Culex tritaeniorhynchus</i> (~70)                                                                                                                                                                                 | Whole individual | Zhejiang (Terrestrial)  | 7,233,954,480       | SRX833670         |
| Odonata mix Hubei                                               | QTM        | Arthropoda: Insecta     | <i>Paracercion melanotum</i> (9), <i>Paracercion calamorum</i> (5), <i>Ceragrion auranticum</i> (10), <i>Brachydiplax chalybea</i> (2), <i>Orthetrum albistylum</i> (1), <i>Pseudothemis zonata</i> (6), <i>Chironomus</i> sp (1)                                                                                                                                                                          | Whole individual | Hubei (Terrestrial)     | 9,226,350,400       | SRR3401072        |
| Orthoptera mix Hubei <sup>a</sup>                               | ZCM        | Arthropoda: Insecta     | <i>Orthoptera</i> sp (3), <i>Conocephalus</i> sp (4), <i>Gryllidae</i> sp.(3)                                                                                                                                                                                                                                                                                                                              | Whole individual | Hubei (Terrestrial)     | 7,042,417,800       | SRX1029952        |
| True flies <sup>a</sup>                                         | Fly        | Arthropoda: Insecta     | <i>Atherigona orientalis</i> (2), <i>Chrysomya megacephala</i> (6), <i>Lucilia sericata</i> (1), <i>Musca domestica</i> (11), <i>Sarcophaga dux</i> (1), <i>S. peregrine</i> (1), <i>S. sp.</i> (1)                                                                                                                                                                                                        | Whole individual | Hubei (Terrestrial)     | 6,574,954,320       | SRX833672         |
| Water striders <sup>a</sup>                                     | SXSSP      | Arthropoda: Insecta     | <i>Gerridae</i> sp. (2 species, 12 individuals)                                                                                                                                                                                                                                                                                                                                                            | Whole individual | Hubei (Land/Freshwater) | 3,154,714,200       | SRX833675         |
| Horseshoe crab mix Beihai                                       | HOU        | Arthropoda: Chelicerata | <i>Carcinoscorpius rotundicauda</i> (8), <i>Tachypleus tridentatus</i> (4)                                                                                                                                                                                                                                                                                                                                 | Whole individual | Guangxi (Costal/Marine) | 13,357,396,400      | SRR3401116        |
| Spiders <sup>a</sup>                                            | spider     | Arthropoda: Chelicerata | <i>Neoscona nautica</i> (14), <i>Parasteatoda tepidariorum</i> (3), <i>Plexippus setipes</i> (3), <i>Pirata</i> sp. (1), <i>Araneae</i> sp (8).                                                                                                                                                                                                                                                            | Whole individual | Hubei (Terrestrial)     | 11,361,912,300      | SRX833697         |
| <i>Tetragnatha maxillosa</i> mix Hubei (subset of arthropodmix) | SSZZ       | Arthropoda: Chelicerata | <i>Tetragnatha maxillosa</i> (2)                                                                                                                                                                                                                                                                                                                                                                           | Whole individual | Hubei (Land/Freshwater) | 2,933,255,400       | SRR3401144        |

|                                                           |           |                         |                                                                                                                                                                                                                                                                                                                                  |                                                                                     |                                                  |                |            |
|-----------------------------------------------------------|-----------|-------------------------|----------------------------------------------------------------------------------------------------------------------------------------------------------------------------------------------------------------------------------------------------------------------------------------------------------------------------------|-------------------------------------------------------------------------------------|--------------------------------------------------|----------------|------------|
| <b>Tick <i>Rhipicephalus microplus</i><sup>a</sup></b>    | microplus | Arthropoda: Chelicerata | <i>Rhipicephalus microplus</i> (5)                                                                                                                                                                                                                                                                                               | Whole individual                                                                    | Hubei (Terrestrial)                              | 1,080,824,801  | -          |
| <b>Ticks <i>Hyalomma asiaticum</i><sup>a</sup></b>        | Liyampi   | Arthropoda: Chelicerata | <i>Hyalomma asiaticum</i> (3)                                                                                                                                                                                                                                                                                                    | Whole individual                                                                    | Xinjiang (Terrestrial)                           | 2,006,000,100  | SRX833696  |
| <b>Ticks<sup>a</sup></b>                                  | Tick      | Arthropoda: Chelicerata | <i>Dermacentor marginatus</i> (4), <i>Dermacentor</i> sp (2), <i>Haemaphysalis doenitzii</i> (3), <i>H. longicornis</i> (4), <i>H. sp.</i> (2), <i>H. formosensis</i> (4), <i>Hyalomma asiaticum</i> (8), <i>Rhipicephalus microplus</i> (6), <i>Argas miniatus</i> (2)                                                          | Whole individual                                                                    | Hubei, Zhejiang, Beijing, Xinjiang (Terrestrial) | 24,708,479,580 | SRX833694  |
| <b>House centipede mix Hubei (subset of arthropodmix)</b> | WHYY      | Arthropoda: Myriapoda   | <i>Scutigera</i> sp.(2)                                                                                                                                                                                                                                                                                                          | Whole individual                                                                    | Hubei (Terrestrial)                              | 2,543,734,600  | SRR3401181 |
| <b>Millipedes<sup>a</sup></b>                             | WHWG      | Arthropoda: Myriapoda   | <i>Polydesmidae</i> sp. (2 species, 12 individuals)                                                                                                                                                                                                                                                                              | Whole individual                                                                    | Hubei, Beijing (Terrestrial)                     | 7,176,702,400  | SRX833700  |
| <b>Myriapoda mix Hubei<sup>a</sup></b>                    | WGML      | Arthropoda: Myriapoda   | <i>Diplopoda</i> sp. (7), <i>Otostigmus scaber</i> (4), <i>Scolopocryptops</i> sp (3), <i>Otostigmus scaber</i> (1), <i>Myriapoda</i> sp (1).                                                                                                                                                                                    | Whole individual                                                                    | Hubei (Terrestrial)                              | 7,337,861,800  | SRX1029951 |
| <b>Barnacle mix Beihai<sup>a</sup></b>                    | BHTH      | Arthropoda: Crustacea   | <i>Amphibalanus rhizophorae</i> (12)                                                                                                                                                                                                                                                                                             | Whole individual (Shell excluded)                                                   | Guangxi (Costal/Marine)                          | 6,150,114,400  | SRX1029956 |
| <b>Blue swimmer crab mix Beihai</b>                       | YYSZX     | Arthropoda: Crustacea   | <i>Portunus</i> sp.(12)                                                                                                                                                                                                                                                                                                          | Representative tissues from gill, various glands, and muscle                        | Beihai (Costal/Marine)                           | 6,903,426,200  | SRR3401268 |
| <b><i>Charybdis</i> crab mix Beihai</b>                   | BHXun     | Arthropoda: Crustacea   | <i>Charybdis</i> sp.(12)                                                                                                                                                                                                                                                                                                         | Representative tissues from gill, various glands, muscle, and stomach (cleaned)     | Guangxi (Costal/Marine)                          | 6,439,342,400  | SRR3401303 |
| <b><i>Charybdis</i> crab mix Wenzhou</b>                  | WZRBX     | Arthropoda: Crustacea   | <i>Charybdis hellerii</i> (2), <i>Charybdis japonica</i> (9), <i>Charybdis lucifera</i> (1)                                                                                                                                                                                                                                      | Representative tissues from gill, various glands, muscle, and stomach (cleared)     | Zhejiang (Costal/Marine)                         | 5,871,404,400  | SRR3401356 |
| <b>Crayfish mix Changjiang</b>                            | CJLX      | Arthropoda: Crustacea   | <i>Procambarus clarkia</i> (12)                                                                                                                                                                                                                                                                                                  | Major organs in the head and gut (cleaned)                                          | Hubei (Freshwater)                               | 5,235,384,200  | SRR3401357 |
| <b>Crustacean mix Wenling</b>                             | WLJQ      | Arthropoda: Crustacea   | <i>Brachyura</i> sp. (2 species, 6), <i>Achelata</i> sp. (3), <i>Penaeoidea</i> sp. (2 species, 3), <i>Ibacus novemdentatus</i> (3), <i>Anomura</i> sp. (3), <i>Penaeidae</i> sp. (2), <i>Charybdis bimaculata</i> (3), <i>Charybdis rufodactylus</i> (3), <i>Latreillidae</i> sp. (2 species, 3), <i>Ovalipes punctatus</i> (3) | Representative tissues from gill, various glands, muscle, and stomach/gut (cleared) | Zhejiang (Costal/Marine)                         | 12,635,742,600 | SRR3401358 |
| <b>Fiddler crab mix Beihai</b>                            | BFZCX     | Arthropoda: Crustacea   | <i>Uca borealis</i> (12)                                                                                                                                                                                                                                                                                                         | Whole individual                                                                    | Guangxi (Costal/Marine)                          | 2,798,966,000  | SRR3401359 |
| <b>Freshwater atyid shrimp Sanxia</b>                     | SXXX      | Arthropoda: Crustacea   | <i>Atyidae</i> sp. (10)                                                                                                                                                                                                                                                                                                          | Whole individual                                                                    | Hubei (Freshwater)                               | 6,994,006,000  | SRR3401361 |
| <b>Freshwater isoptera Shahe (subset of SHWCII)</b>       | SHWC0209c | Arthropoda: Crustacea   | <i>Daphnia magna</i> (N/A), <i>Daphnia carinata</i> (N/A), <i>Moina macrocopa</i> (N/A)                                                                                                                                                                                                                                          | Whole individual                                                                    | Beijing (Freshwater)                             | 3,629,030,800  | SRR3401363 |
| <b>Hermit crab mix Beihai</b>                             | BHJJX     | Arthropoda: Crustacea   | <i>Anomura</i> sp. (2 species, 12 individuals)                                                                                                                                                                                                                                                                                   | Representative tissues from gill, various glands, muscle, and stomach/gut (cleared) | Guangxi (Costal/Marine)                          | 5,901,889,800  | SRR3401367 |
| <b>Mantis shrimp mix Beihai</b>                           | BHXG      | Arthropoda: Crustacea   | <i>Miyakea</i> sp.(12)                                                                                                                                                                                                                                                                                                           | Representative tissues from gill, various glands, muscle, and gut (cleared)         | Guangxi (Costal/Marine)                          | 2,942,421,800  | SRR3401372 |
| <b>Penaeid shrimp mix Beihai I</b>                        | BHBIDX    | Arthropoda: Crustacea   | <i>Penaeidae</i> sp. (4 species, 12 individuals)                                                                                                                                                                                                                                                                                 | Representative tissues from gill, various glands, muscle, and gut (cleared)         | Guangxi (Costal/Marine)                          | 5,585,967,800  | SRR3401376 |
| <b>Penaeid shrimp mix Beihai II</b>                       | BHWZXX    | Arthropoda: Crustacea   | <i>Penaeidae</i> sp. (12)                                                                                                                                                                                                                                                                                                        | Representative tissues from gill, various glands, muscle, and gut (cleared)         | Guangxi (Costal/Marine)                          | 5,818,589,600  | SRR3401379 |
| <b>Pillworm mix Hubei</b>                                 | WHSFII    | Arthropoda: Crustacea   | <i>Armadillidium vulgare</i> (12), <i>Armadillidium</i> sp. (N/A)                                                                                                                                                                                                                                                                | Whole individual                                                                    | Hubei (Terrestrial)                              | 8,006,953,800  | SRR3401380 |
| <b>Pillworm mix Hubei PolyA<sup>b</sup></b>               | WHSF      | Arthropoda: Crustacea   | <i>Armadillidium vulgare</i> (12), <i>Armadillidium</i> sp. (N/A)                                                                                                                                                                                                                                                                | Whole individual                                                                    | Hubei (Terrestrial)                              | 3,004,821,000  | SRR3401383 |

|                                                                                         |              |                       |                                                                                                                                                                                                 |                                                                                 |                          |                |            |
|-----------------------------------------------------------------------------------------|--------------|-----------------------|-------------------------------------------------------------------------------------------------------------------------------------------------------------------------------------------------|---------------------------------------------------------------------------------|--------------------------|----------------|------------|
| Sesamid crab mix Beihai                                                                 | SCJXSX       | Arthropoda: Crustacea | <i>Perisesarma bidens</i> (8)                                                                                                                                                                   | Representative tissues from gill, various glands, muscle, and stomach (cleared) | Guangxi (Costal/Marine)  | 6,176,296,400  | SRR3401386 |
| Shrimps <sup>a</sup>                                                                    | Shrimp       | Arthropoda: Crustacea | <i>Exopalaemon carinicauda</i> (12), <i>Metapenaeus</i> sp. (6), <i>Solenocera crassicornis</i> (6), <i>Penaeus monodon</i> (12), <i>Litopenaeus vannamei</i> (12)                              | Representative tissues from gill, various glands, muscle, and gut               | Zhejiang (Costal/Marine) | 5,365,359,900  | SRX833698  |
| Tiger crab mix Beihai                                                                   | HWRTX        | Arthropoda: Crustacea | <i>Orithyia</i> sp.(12)                                                                                                                                                                         | Representative tissues from gill, various glands, muscle, and stomach (cleared) | Guangxi (Costal/Marine)  | 4,795,618,600  | SRR3401390 |
| Wharf roach mix Beihai                                                                  | BHHZL        | Arthropoda: Crustacea | <i>Ligia exotica</i> (12)                                                                                                                                                                       | Whole individual                                                                | Guangxi (Costal/Marine)  | 7,045,711,200  | SRR3401392 |
| Woodlouse mix Beihai                                                                    | BHTSS        | Arthropoda: Crustacea | <i>Sphaeroma</i> sp. (11), <i>Isopoda</i> sp.(1)                                                                                                                                                | Whole individual                                                                | Guangxi (Costal/Marine)  | 6,651,427,000  | SRR3401395 |
| Arthropod mix Hubei <sup>a</sup>                                                        | Arthropodmix | Arthropoda            | <i>Cicadellidae</i> sp. (10), <i>Tetragnatha maxillosa</i> (1), <i>Heteroptera</i> sp. (10), <i>Scutigera</i> sp. (2), <i>Ctenocephalides felis</i> (10-15), <i>Tetramorium tsushimae</i> (N/A) | Whole individual                                                                | Hubei (Terrestrial)      | 7,768,505,600  | SRX1029954 |
| Freshwater arthropod Shahe                                                              | SHWCII       | Arthropoda            | <i>Heteroptera</i> sp. (12), <i>Daphnia magna</i> (N/A), <i>Daphnia carinata</i> (N/A), <i>Moina macrocopa</i> (N/A)                                                                            | Whole individual                                                                | Beijing (Freshwater)     | 13,203,058,800 | SRR3401396 |
| Freshwater arthropod Shahe PolyA (same pool as Freshwater arthropod Shahe) <sup>b</sup> | SHWC         | Arthropoda            | <i>Heteroptera</i> sp. (12), <i>Daphnia magna</i> (N/A), <i>Daphnia carinata</i> (N/A), <i>Moina macrocopa</i> (N/A)                                                                            | Whole individual                                                                | Beijing (Freshwater)     | 6,709,741,800  | SRR3401397 |
| Insects mix 3 <sup>a</sup>                                                              | WHCC         | Arthropoda            | <i>Pseudothemis zonata</i> (2), <i>Nepidae</i> sp (2 species, 3), <i>Camponotus japonicus</i> (~5), <i>Diplonychus</i> sp (2), <i>Asellus</i> sp (N/A)                                          | Whole individual                                                                | Hubei (Terrestrial)      | 11,973,368,200 | SRX833688  |
| Chicken gut roundworm mix Hubei                                                         | WHJHC        | Nematoda              | <i>Ascaridia galli</i> (1)                                                                                                                                                                      | Whole individual                                                                | Hubei (Terrestrial)      | 2,927,034,400  | SRR3401442 |
| Chicken gut roundworm mix Shayang                                                       | SYJFC        | Nematoda              | <i>Ascaridia galli</i> (15)                                                                                                                                                                     | Whole individual                                                                | Hubei (Terrestrial)      | 6,544,479,600  | SRR3401450 |
| Common pheasant gut roundworm mix                                                       | JMYJCC       | Nematoda              | <i>Ascaridia</i> sp. (20)                                                                                                                                                                       | Whole individual                                                                | Hubei (Terrestrial)      | 6,882,381,600  | SRR3401460 |
| Large pig roundworm mix Hubei                                                           | WHZHC        | Nematoda              | <i>Ascaris suum</i> (10)                                                                                                                                                                        | Whole individual                                                                | Hubei (Terrestrial)      | 6,813,270,000  | SRR3401464 |
| Romanomermis nematode mix Wuchang                                                       | WCLSXC       | Nematoda              | <i>Romanomermis</i> sp.(N/A)                                                                                                                                                                    | Front, middle, and rear section of the worm                                     | Hubei (Terrestrial)      | 6,901,779,600  | SRR3401495 |
| Roundworm mix Hubei                                                                     | HC           | Nematoda              | <i>Ascaridia galli</i> (1), <i>Ascaris suum</i> (6)                                                                                                                                             | Front, middle, and rear section of the worm                                     | Hubei (Terrestrial)      | 5,125,628,600  | SRR3401500 |
| Snake-associated nematodes mix Xinzhou                                                  | XZSJSC       | Nematoda              | <i>Nematoda</i> sp. (14), <i>Ascarididae</i> sp.(2)                                                                                                                                             | Whole individual                                                                | Hubei (Terrestrial)      | 6,303,423,200  | SRR3401559 |
| Spirurian nematodes mix Hubei                                                           | WHSWHC       | Nematoda              | <i>Spirurida</i> sp1.(4)                                                                                                                                                                        | Whole individual                                                                | Hubei (Terrestrial)      | 6,210,937,000  | SRR3401566 |
| Spirurian nematodes mix Xinshan                                                         | XSNXC        | Nematoda              | <i>Spirurida</i> sp2.(45)                                                                                                                                                                       | Whole individual                                                                | Zhejiang (Terrestrial)   | 7,004,525,000  | SRR3401569 |
| Peanut worms mix Beihai                                                                 | BHNXC        | Sipuncula             | <i>Phascolosoma esculenta</i> (12), <i>Sipunculus nudus</i> (12)                                                                                                                                | Whole individual                                                                | Guangxi (Costal/Marine)  | 7,041,903,800  | SRR3401570 |
| Earthworm mix Changping                                                                 | CPQY         | Annelida              | <i>Oligochaeta</i> sp. (2 species, 12 individuals)                                                                                                                                              | Whole individual                                                                | Beijing (Terrestrial)    | 2,191,254,200  | SRR3401619 |
| Leech mix Hubei                                                                         | SZmix        | Annelida              | <i>Whitmania pigra</i> (11)                                                                                                                                                                     | Inner organs                                                                    | Hubei (Freshwater)       | 6,235,167,800  | SRR3401621 |
| Sandworms mix Beihai                                                                    | BHSC         | Annelida              | <i>Marphysa</i> sp (12), <i>Nereis aiubhitensis</i> (12)                                                                                                                                        | Whole individual                                                                | Guangxi (Costal/Marine)  | 6,114,388,200  | SRX1712659 |
| Bivalva mix Beihai PolyA <sup>b</sup>                                                   | BHBei        | Mollusca              | <i>Anadara sativa</i> (12), <i>Crassostrea hongkongensis</i> (12), <i>Anomalocardia producta</i> (12), <i>Solen strictus</i> (12), <i>Paphia undulata</i> (10), <i>Veneridae</i> sp (2).        | Visceral mass with gut content removed if possible                              | Guangxi (Costal/Marine)  | 6,514,906,000  | SRX1712661 |
| Bivalva mix Wenzhou                                                                     | Beimix       | Mollusca              | <i>Barbatia virescens</i> (12), <i>Sinonovacula constricta</i> (12), <i>Tegillarca granosa</i> (12), <i>Crassostrea ariakensis</i> (12), <i>Mytilus coruscus</i> (12)                           | Visceral mass with gut content removed if possible                              | Zhejiang (Costal/Marine) | 8,971,077,600  | SRX1712664 |
| Bivalva mix Wenzhou PolyA (same pool as Beimix) <sup>b</sup>                            | WZSBei       | Mollusca              | <i>Barbatia virescens</i> (12), <i>Sinonovacula constricta</i> (12), <i>Tegillarca granosa</i> (12), <i>Crassostrea ariakensis</i> (12), <i>Mytilus coruscus</i> (12)                           | Visceral mass with gut content removed if possible                              | Zhejiang (Costal/Marine) | 5,831,177,600  | SRX1712669 |
| Channeled applesnail mix                                                                | WZFSL        | Mollusca              | <i>Pomacea canaliculata</i> (12)                                                                                                                                                                | Visceral mass                                                                   | Zhejiang (Freshwater)    | 5,978,349,200  | SRX1712672 |

| Wenzhou                                                          |          |                 |                                                                                                                              |                                                    |                          |               |            |  |
|------------------------------------------------------------------|----------|-----------------|------------------------------------------------------------------------------------------------------------------------------|----------------------------------------------------|--------------------------|---------------|------------|--|
| Chinese land snail mix Wuhan                                     | WHWN     | Mollusca        | <i>Mastiguelota kiangsinensis</i> (12)                                                                                       | Visceral mass with gut content removed             | Hubei (Land/Freshwater)  | 6,347,332,000 | SRX1712673 |  |
| Freshwater shellfish ( <i>Unio douglasiae</i> ) mix Wuhan        | WHBL     | Mollusca        | <i>Unio douglasiae</i> (12)                                                                                                  | Visceral mass with gut content removed             | Hubei (Freshwater)       | 6,105,707,200 | SRX1712674 |  |
| Gastropoda mix Wenzhou                                           | WZSLuoI  | Mollusca        | <i>Neverita didyma</i> (12), <i>Chlorostoma turbinatum</i> (12), <i>Turritella bacillum</i> (12), <i>Reishia bronni</i> (12) | Visceral mass with gut content removed if possible | Zhejiang (Costal/Marine) | 4,792,141,800 | SRX1712690 |  |
| Gastropoda mix Wenzhou PolyA (same pool as WZSLuoI) <sup>b</sup> | WZSLuoII | Mollusca        | <i>Neverita didyma</i> (12), <i>Chlorostoma turbinatum</i> (12), <i>Turritella bacillum</i> (12), <i>Reishia bronni</i> (12) | Visceral mass with gut content removed if possible | Zhejiang (Costal/Marine) | 6,030,622,200 | SRX1712699 |  |
| Murex snails mix Beihai                                          | BHCL     | Mollusca        | <i>Chicoreus asianus</i> (12)                                                                                                | Visceral mass with gut content removed             | Guangxi (Costal/Marine)  | 5,674,728,400 | SRX1712833 |  |
| Octopus mix Beihai                                               | BHZY     | Mollusca        | <i>Octopodidae sp.</i> (12)                                                                                                  | Visceral mass with gut content removed             | Guangxi (Costal/Marine)  | 6,476,318,600 | SRX1712836 |  |
| <i>Paphia</i> shell mix Beihai                                   | BWBFG    | Mollusca        | <i>Paphia undulata</i> (10), <i>Veneridae sp.</i> (2)                                                                        | Visceral mass                                      | Guangxi (Costal/Marine)  | 4,754,857,000 | SRX1712837 |  |
| Razor shell mix Beihai                                           | BHZC     | Mollusca        | <i>Solen strictus</i> (12)                                                                                                   | Visceral mass with gut content removed             | Guangxi (Costal/Marine)  | 5,134,546,200 | SRX1712840 |  |
| <i>Turritella</i> sea snails mix Beihai                          | BZL      | Mollusca        | <i>Turritella sp.</i> (12)                                                                                                   | Visceral mass with gut content removed             | Guangxi (Costal/Marine)  | 5,294,621,400 | SRX1712841 |  |
| Blood flukes mix Anhui 1                                         | JSC      | Platyhelminthes | <i>Schistosoma mansoni</i> (N/A), <i>Schistosoma japonicum</i> (N/A)                                                         | Whole individual                                   | Anhui (Freshwater)       | 6,229,641,400 | SRX1712974 |  |
| Blood flukes mix Anhui 2                                         | RBXXC    | Platyhelminthes | <i>Schistosoma japonicum</i> (N/A)                                                                                           | Whole individual                                   | Anhui (Freshwater)       | 7,156,816,600 | SRX1712977 |  |
| Blood flukes mix Hubei                                           | HBXXC    | Platyhelminthes | <i>Schistosoma japonicum</i> (N/A)                                                                                           | Whole individual                                   | Hubei (Freshwater)       | 7,121,948,800 | SRX1712978 |  |
| Tapeworm mix Hubei                                               | SGJSC    | Platyhelminthes | <i>Taenia sp.</i> (8)                                                                                                        | Whole individual                                   | Hubei (Terrestrial)      | 6,651,705,600 | SRX1712979 |  |
| Echinoderm mix Beihai                                            | BHJP     | Echinodermata   | <i>Temnopleurus sp.</i> (3), <i>Dendrochirotida sp.</i> (9)                                                                  | Inner organs                                       | Guangxi (Costal/Marine)  | 5,314,194,400 | SRX1712980 |  |
| Tunicates mix Beihai                                             | BHHQ     | Tunicata        | <i>Styela plicata</i> (N/A), <i>Stolidobranchia sp.</i> (N/A)                                                                | Inner organs                                       | Guangxi (Costal/Marine)  | 6,111,464,000 | SRX1712981 |  |
| Sea anemones mix Beihai                                          | BHHK     | Cnidaria        | <i>Bolocera sp.</i> (12)                                                                                                     | Whole individual                                   | Guangxi (Costal/Marine)  | 4,684,310,400 | SRX1712982 |  |

<sup>a</sup>These libraries were described in previous studies<sup>3,6,9</sup>.

<sup>b</sup>These libraries were prepared using the TruSeq mRNA Library Preparation protocol (Illumina) that only targeted RNA with poly (A) tails.
